# Supplementary material for: Band structure engineering in Sn1.03Te through an In-induced resonant level
Source: Royal Society of Chemistry journal article supplement (doi:10.1039/c9tc04407h), 2019-10-30
Supplement: c9tc04407h1.pdf [file c9tc04407h1.pdf]

## Electronic Supplementary Information

### Band Structure Engineering in $\text{Sn}_{1.03}\text{Te}$ Through In-induced Resonant Level

Shantanu Misra<sup>1</sup>, Bartłomiej Wiendlocha<sup>2,†</sup>, Janusz Tobola<sup>2</sup>, Florian Fesquet<sup>1</sup>, Anne Dauscher<sup>1</sup>,  
Bertrand Lenoir<sup>1</sup>, Christophe Candolfi<sup>1,\*</sup>

<sup>1</sup>*Institut Jean Lamour, UMR 7198 CNRS – Université de Lorraine, 2 allée André Guinier-  
Campus ARTEM, BP 50840, 54011 Nancy Cedex, France*

<sup>2</sup>*Faculty of Physics and Applied Computer Science, AGH University of Science and  
Technology, Aleja Mickiewicza 30, 30-059 Krakow, Poland*

\*Corresponding authors: \* [christophe.candolfi@univ-lorraine.fr](mailto:christophe.candolfi@univ-lorraine.fr) ; † [wiendlocha@fis.agh.edu.pl](mailto:wiendlocha@fis.agh.edu.pl)

#### Content

**Figure S1.** Evolution of the Ioffe-Pisarenko curve calculated by a two-valence-band model upon varying a) the density-of-states effective masses of the light-hole valence band, b) of the heavy-hole valence band, and c) the energy offset between the light and heavy-hole valence bands.

**Figure S2.** Temperature dependence of the Lorenz number a) for the series  $\text{Sn}_{1.03-x}\text{In}_x\text{Te}$  calculated by a single parabolic band model and b) by a two-valence-band model with temperature-dependent band parameters for the  $x = 0$  composition.

**Figure S3.** Temperature dependence of the lattice thermal conductivity  $\kappa_{ph}$  of the series  $\text{Sn}_{1.03-x}\text{In}_x\text{Te}$  determined by using the Lorenz numbers calculated by a single parabolic band model.

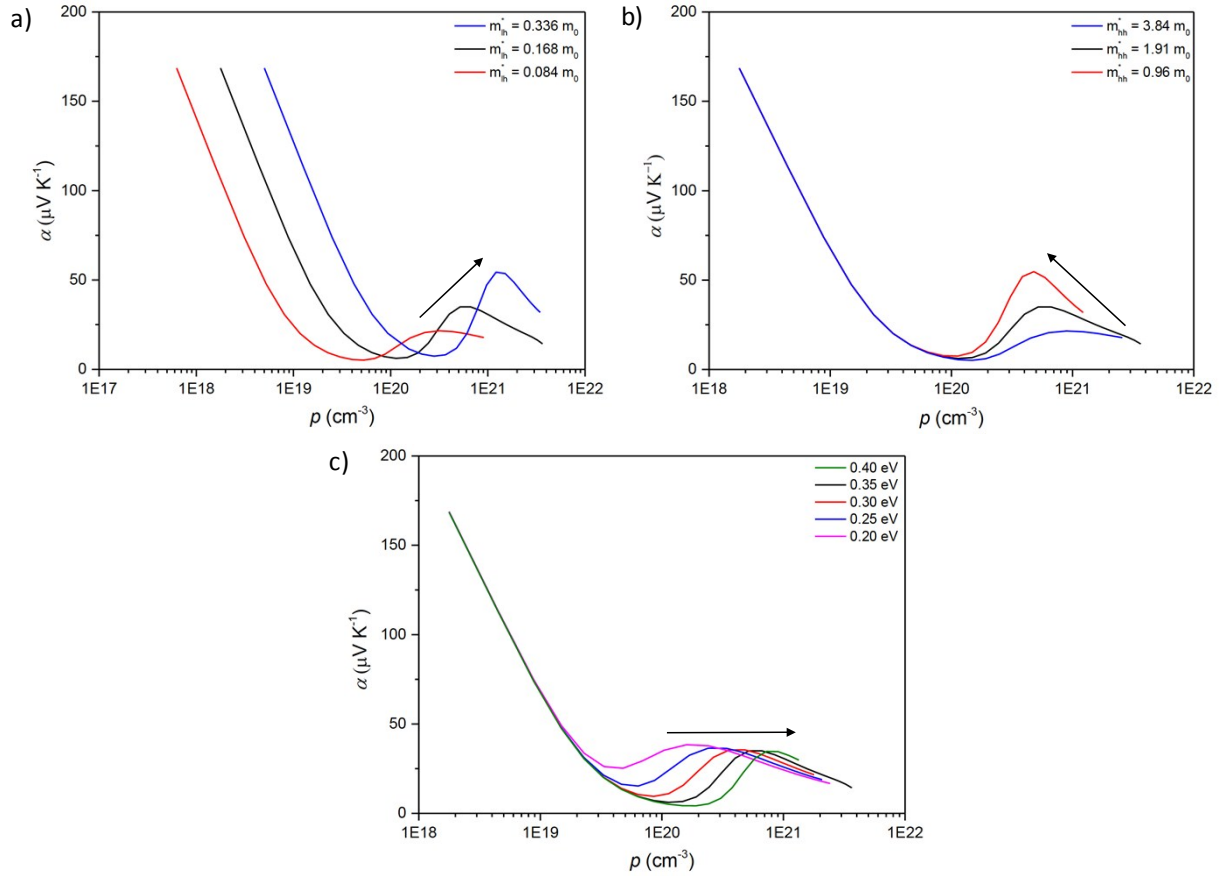

**Figure S1.** Evolution of the Ioffe-Pisarenko curve calculated by a two-valence-band model upon varying a) the density-of-states effective masses of the light-hole valence band  $m_{lh}^*$ , b) of the heavy-hole valence band  $m_{hh}^*$ , and c) the energy offset  $\Delta E$  between the light and heavy-hole valence bands. The black arrows mark the evolution of the curve when the corresponding band parameter increases. The values usually admitted for SnTe at 300 K are  $0.168m_0$ ,  $1.92m_0$  and  $0.30$  eV for  $m_{lh}^*$ ,  $m_{hh}^*$  and  $\Delta E$ , respectively.

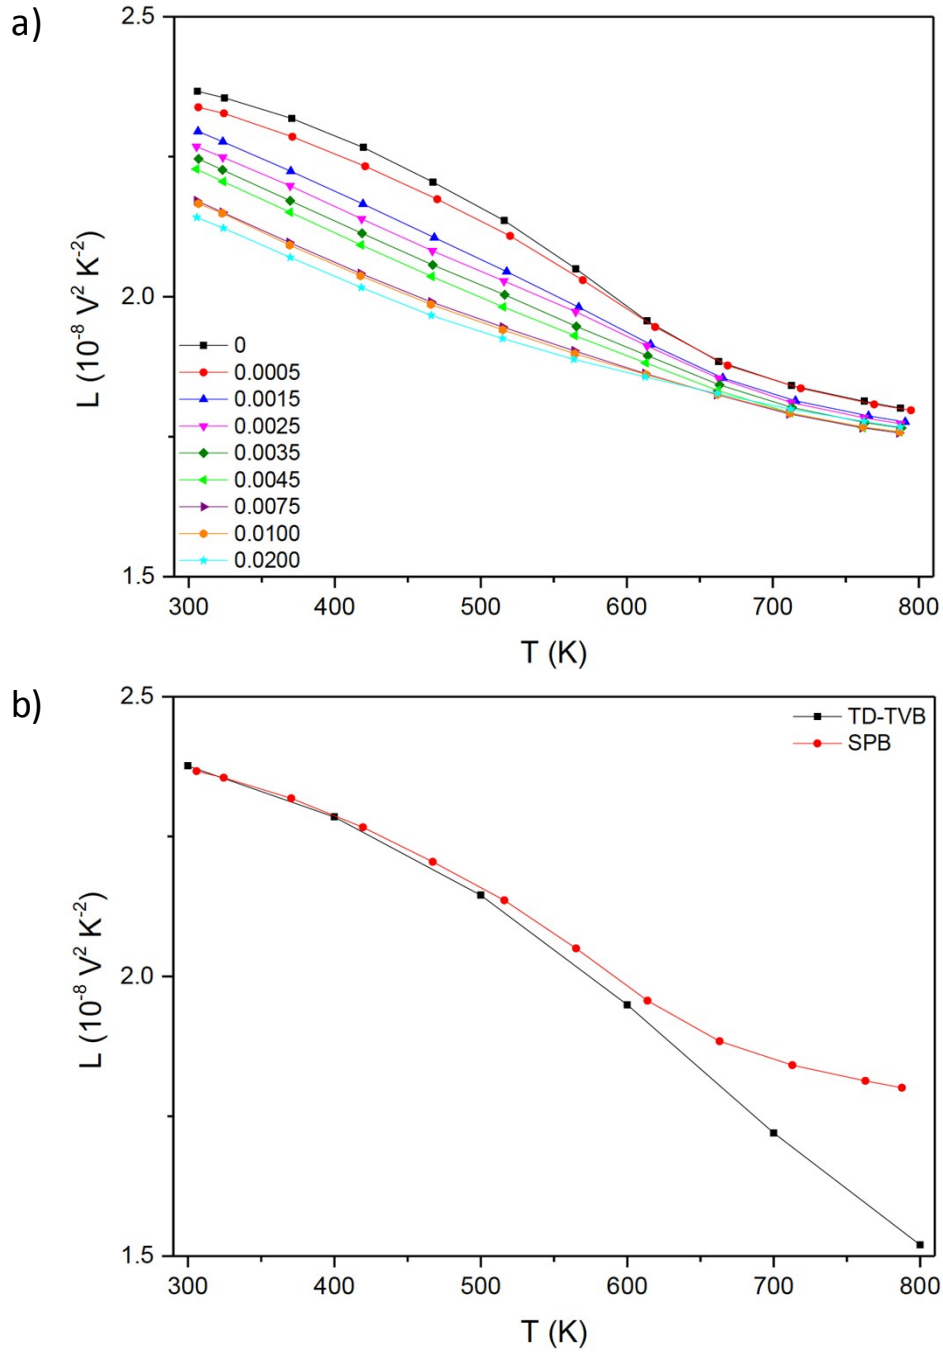

**Figure S2.** Temperature dependence of the Lorenz number  $L$  a) for the series  $\text{Sn}_{1.03-x}\text{In}_x\text{Te}$  calculated by a single parabolic band (SPB) model and b) by a two-valence-band model with temperature-dependent band (TD-TVB) parameters for the  $x = 0$  composition. Both models give very similar results below 500 K for the  $x = 0$  compound. Above this temperature,  $L$  further decreases upon taking into account the temperature dependence of the band parameters.

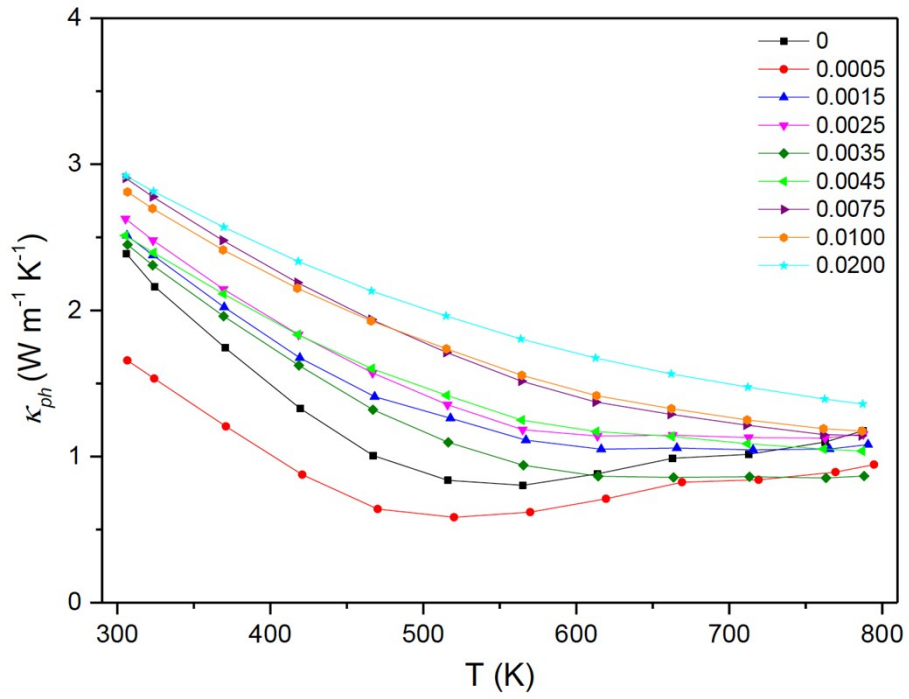

**Figure S3.** Temperature dependence of the lattice thermal conductivity  $\kappa_{ph}$  of the series  $\text{Sn}_{1.03-x}\text{In}_x\text{Te}$  determined by using the Lorenz numbers calculated by a single parabolic band model.
